# Supplementary material for: A newly reconciled data set for identifying sea level rise and variability in Dublin Bay
Source: Copernicus journal article supplement (doi:10.5194/os-2021-92), 2021-10-11
Supplement: Supplementary file [file os-2021-92-AC1-supplement.pdf]

Table 1- Details of the Tide gauges installed at Dublin port.

| Gauge type                | Start | End  | Reference                                                                                                         |
|---------------------------|-------|------|-------------------------------------------------------------------------------------------------------------------|
| Float Gauge               | 1938  | 2001 | Original charts supplied by Dublin City Council indicate float gauge in operation from records beginning to 2003. |
| Druck Pressure Transducer | 2001  | 2016 | Stated sensor type in Murphy et al., 2003. This sensor began to malfunction in 2017 and was replaced in 2018.     |
| OTT Bubbler               | 2018  | -    | New sensor installed in 2018. Data not used in this study.                                                        |

Table 2- Details of the datasets collated to form a complete sea level record for Dublin Port.

| Dataset name   | Duration  | Sampling frequency | Provider                       |
|----------------|-----------|--------------------|--------------------------------|
| Port Authority | 1938-2001 | Annual             | Woodworth et al. (1991), PSMSL |
| Port Authority | 1978-2001 | Monthly            | Woodworth et al. (1991), PSMSL |
| Harbourmaster  | 2002-2009 | 10-minute          | PSMSL                          |
| NTGN           | 2006-2019 | 5-minute           | Marine Institute               |
| Greene         | 1968-2013 | Twice daily        | This study                     |

Table 3- Dublin's SLR rate during different periods with and without Perigean.

| 1953-2016 (with perigean)     | 1953-2016 (without perigean) | 1997-2016 (with perigean)    | 1997-2016 (without perigean) |
|-------------------------------|------------------------------|------------------------------|------------------------------|
| 1.08<br>(95% CI: 0.62 – 1.55) | 1.1<br>(95% CI: 0.57 –1.57)  | 6.48<br>(95% CI: 4.22 – 8.8) | 7.07<br>(95% CI: 5.15 –8.93) |

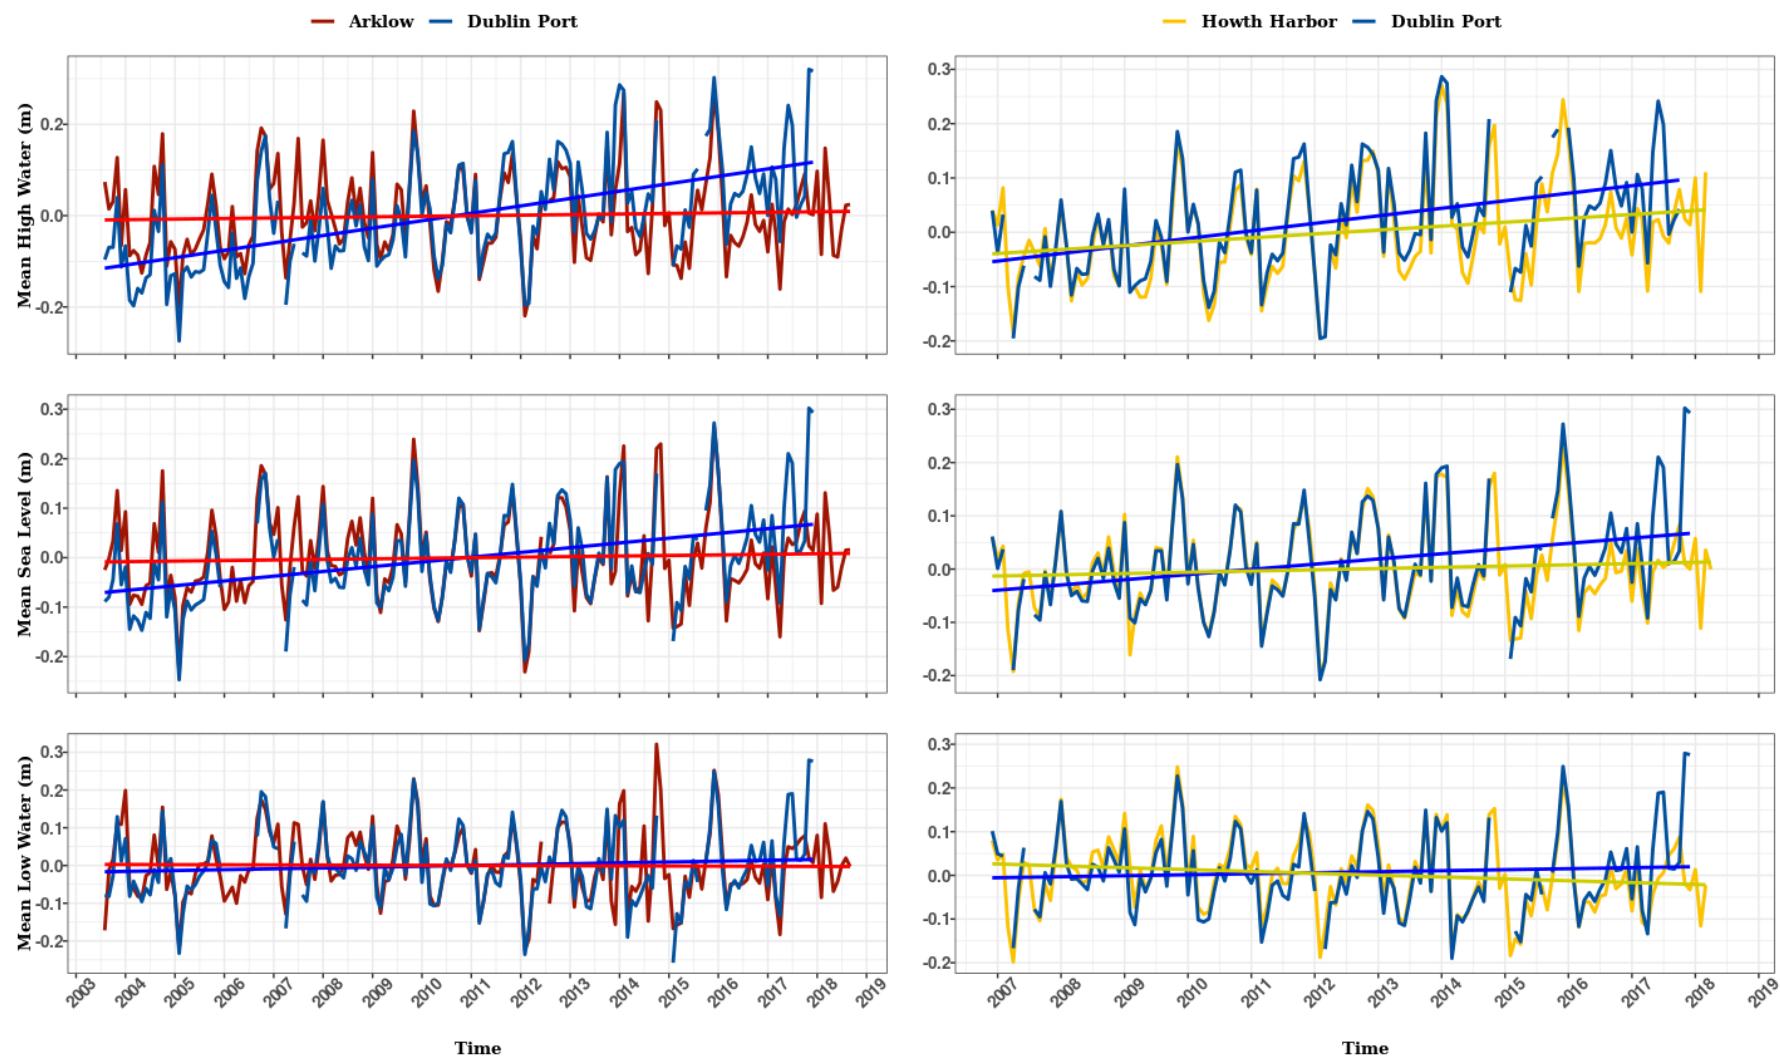

Figure 1. MHW, MSL and MLW monthly values of Dublin Port against Arklow (left panels) and Howth Harbour (right panels)
